# Supplementary material for: Comprehensive evaluation of AT(N) imaging biomarkers for predicting cognition
Source: bioRxiv or medRxiv preprint supplement (doi:10.1101/2024.11.25.24317943), 2024-11-27
Supplement: Supplementary file [file media-1.pdf]

# 1 Supplement

## 2 eMethods

### 3 PET-based staging systems

4 PET-based staging systems were included as non-binary categorical measures  
5 of A $\beta$  and tau pathology. We included two systems for A $\beta$ : a three-stage system  
6 developed by Mattsson et al<sup>1</sup> and a four-stage system developed by Collij et al<sup>2</sup>. We  
7 included Braak staging for tau<sup>3,4</sup>, including both a three-stage and six-stage version.  
8 Each stage in each system was associated with a collection of Freesurfer ROIs (stage  
9 composite), as shown in eTable 2, with advancing stages indicating regions where  
10 pathology spreads over the disease course.

11 The method for Mattsson staging and Braak staging were similar and proceeded  
12 as follows. First, an average SUVR was calculated in each stage composite using a  
13 volume weighted average of bilateral regions. Next, Gaussian mixture models (GMM)  
14 were fit to the distribution of uptake in each stage composite to estimate a binary cutoff  
15 for stage positivity (as described in the main text Methods: Image-based biomarker  
16 definitions). These cutoffs allowed us to assign binary positivity measures for each  
17 subject in each stage composite. Disease stages were then assigned based on  
18 individual patterns of positivity: to be assigned a given disease stage, an individual had  
19 to exhibit positivity for that stage and all prior ones. In case an individual was positive  
20 for a given stage but not all prior stages, they were marked as non-stageable.  
21 Individuals could also be assigned stage 0 if they were not positive for pathology in any  
22 stage composite.

23 Collij staging was slightly different in that positivity for a stage composite was  
24 based on being positive for pathology in most ROIs corresponding to a given stage.  
25 That is, GMMs were fit to each Freesurfer ROI individually, and positivity for a stage  
26 composite was defined by exhibiting supra-threshold uptake in 50% or more of the

27 associated ROIs. Disease stage assignment then proceeded in the same manner as  
28 for Mattsson and Braak staging (individuals needed to be positive for a given disease  
29 stage and all prior stages).

## 30 Cross-validation experiments

31 Cross-validated modeling was implemented in Python (v3.10) using scikit-learn  
32 (v1.4.2). For all cross-validation experiments, CDR status was used as a stratifying  
33 variable. Random samples were also seeded, such that the individuals of each testing  
34 fold were the same across experiments with the same input data. All cross-validation  
35 experiments had 10 outer folds and were repeated 10 times to generate 100 out of  
36 sample error estimates for each tested model.

37 We first ran models for each biomarker separately to assess the predictive value  
38 of each included definition. These experiments used a non-nested, 10-fold cross-  
39 validation. In each iteration, training data were used to fit linear regressions where  
40  $PHC_{Global}$  was predicted from a single biomarker and covariates (age, sex, *APOE* E4  
41 positivity). That is, separate models were fit for each biomarker. Biomarker definitions  
42 with tunable parameters (Z-scores, GMMs) were also fit with training data. A baseline  
43 model was also trained in each iteration which only included covariates as predictors.  
44 Trained models were then evaluated on the testing fold data, and the prediction  
45 accuracies for each were calculated as root mean squared error (RMSE).

46 We next created combinatorial models to test if combination of biomarkers  
47 improved prediction accuracy and if models incorporating continuous or non-categorical  
48 binary biomarkers outperformed models with binary biomarkers. For these  
49 experiments, we used nested cross-validation with 10 outer folds and 5 inner folds. In  
50 the inner cross-validation, a model selection procedure was applied to identify the best  
51 performing individual predictors (like the non-nested cross-validation experiment  
52 described above). Inner training data were used to fit linear models predicting  $PHC_{Global}$   
53 with single biomarkers plus covariates as predictors. Inner testing data were used to  
54 measure the out-of-sample accuracy of these models. We then grouped the models  
55 based on the pathology (AT(N)) and variable type (binary/non-binary

56 categorical/continuous) and selected the best performing biomarker definitions (lowest  
57 average RMSE across 5 test folds). The outer cross-validation was then used for  
58 training new linear models which combined the biomarkers selected from the inner  
59 cross-validation. eTable 3 shows all the combinatorial linear models that were  
60 evaluated in the outer loop using this training scheme.

61 We also used support vector machine (SVM) regression to directly predict  
62  $\text{PHC}_{\text{Global}}$  from imaging data. SVMs were trained using regional  $A\beta$  uptakes, tau  
63 uptakes, or gray matter volumes as input features. An additional model combined all  
64 these regional imaging features into a multimodal predictive model. SVM training used  
65 a nested cross-validation design with 10 outer folds and 5 inner folds. The inner loop  
66 was used for hyperparameter tuning for the regularization parameter  $C$ , the kernel, and  
67 the kernel coefficient  $\gamma$ . Search spaces were informed by consensus  
68 recommendations<sup>5</sup> and from pilot experiments: kernel (linear or radial basis function  
69 [RBF]),  $C$  with linear kernel ( $2^{-10}, 2^{-9}, \dots, 2^{-1}, 2^0$ ),  $C$  with RBF kernel  
70 ( $2^{-5}, 2^{-3}, \dots, 2^{13}, 2^{15}$ ),  $\gamma$  with RBF kernel ( $2^{-15}, 2^{-13}, \dots, 2^1, 2^3$ ). The best  
71 hyperparameters were determined from the inner loop (lowest average RMSE across 5  
72 test folds) and used to retrain and evaluate SVM models in the outer loop.

## 73 Feature importance analyses

74 We ran additional post-hoc analyses to probe feature importance for our cross-  
75 validated linear modeling. For models which applied a model selection to filter  
76 biomarker definitions, we created pie charts showing the specific biomarker definitions  
77 which were selected as the best performing over repeated cross-validation iterations.  
78 We also extracted and plotted the (standardized) linear model coefficients for the  $A\beta$ ,  
79 tau, and neurodegeneration biomarkers in all binary and all continuous models (non-  
80 binary categorical models were omitted because coefficient interpretation is less  
81 straightforward for non-binary categorical features). Finally, we visualized the cutoff  
82 values that were selected for  $A\beta$  and tau from models with all binary definitions.

83 For SVM models, we visualized the feature importance of individual brain regions  
84 for  $A\beta$ , tau, and neurodegeneration features. Following previous work<sup>6,7</sup>, feature

85 importance values were generated by calculating the covariance of each feature and  
86  $PHC_{Global}$ . We generated brain maps showing the average feature importance across  
87 100 out-of-sample model predictions. Maps were generated for the combined SVM and  
88 for each unimodal SVM.

89

| Name                            | Pathology | Variable type          | Description                                                    |
|---------------------------------|-----------|------------------------|----------------------------------------------------------------|
| A $\beta$ composite             | A $\beta$ | Continuous             | A $\beta$ SUVR in summary composite region                     |
| Centiloid                       | A $\beta$ | Continuous             | Linear transformation of A $\beta$ composite SUVR <sup>8</sup> |
| A $\beta$ SUVR>1.11             | A $\beta$ | Binary                 | Cutoff from Landau et al. <sup>9</sup>                         |
| A $\beta$ SUVR>1.24             | A $\beta$ | Binary                 | Cutoff from Su et al. <sup>10</sup>                            |
| A $\beta$ SUVR>1.42             | A $\beta$ | Binary                 | Cutoff from Jack et al. <sup>11</sup> (reliable worsening)     |
| A $\beta$ SUVR>1.30             | A $\beta$ | Binary                 | Cutoff from Jack et al. <sup>11</sup> (specificity)            |
| Centiloid>15                    | A $\beta$ | Binary                 | Binary cutoff for Centiloid                                    |
| Centiloid>20                    | A $\beta$ | Binary                 | Binary cutoff for Centiloid                                    |
| Centiloid>25                    | A $\beta$ | Binary                 | Binary cutoff for Centiloid                                    |
| Centiloid>30                    | A $\beta$ | Binary                 | Binary cutoff for Centiloid                                    |
| A $\beta$ composite (GMM)       | A $\beta$ | Binary                 | A $\beta$ composite SUVR binarized with a GMM                  |
| A $\beta$ composite (z>2.0)     | A $\beta$ | Binary                 | Z-score cutoff of 2 for A $\beta$ composite SUVR               |
| A $\beta$ composite (z>2.5)     | A $\beta$ | Binary                 | Z-score cutoff of 2.5 for A $\beta$ composite SUVR             |
| A $\beta$ composite (Quartiles) | A $\beta$ | Non-binary categorical | Quartiles of the A $\beta$ composite SUVR                      |
| Centiloid (Quartiles)           | A $\beta$ | Non-binary categorical | Quartiles of Centiloid                                         |
| Mattsson staging                | A $\beta$ | Non-binary categorical | A $\beta$ –PET staging system <sup>2</sup>                     |
| Collij staging                  | A $\beta$ | Non-binary categorical | A $\beta$ –PET staging system <sup>1</sup>                     |
| A $\beta$ composite (BIZ)       | A $\beta$ | Non-binary categorical | Binarization with an intermediate zone for A $\beta$ composite |
| Centiloid (BIZ)                 | A $\beta$ | Non-binary categorical | Binarization with an intermediate zone for Centiloid           |
| MT tau SUVR                     | Tau       | Continuous             | Tau SUVR in meta-temporal composite region                     |
| Braak I SUVR                    | Tau       | Continuous             | Tau SUVR in Braak I composite region                           |
| Braak III/IV SUVR               | Tau       | Continuous             | Tau SUVR in Braak III/IV composite region                      |
| Braak V/VI SUVR                 | Tau       | Continuous             | Tau SUVR in Braak V/VI composite region                        |
| MT tau (GMM)                    | Tau       | Binary                 | Meta-temporal tau SUVR binarized with a GMM                    |
| MT tau (z>2.0)                  | Tau       | Binary                 | Z-score cutoff of 2 for MT tau SUVR                            |
| MT tau (z>2.5)                  | Tau       | Binary                 | Z-score cutoff of 2.5 for MT tau SUVR                          |
| Tau SUVR>1.20                   | Tau       | Binary                 | Cutoff from Jack et al. <sup>11</sup> (sensitivity)            |
| Tau SUVR>1.21                   | Tau       | Binary                 | Cutoff from Jack et al. <sup>11</sup> (specificity)            |
| Tau SUVR>1.23                   | Tau       | Binary                 | Cutoff from Jack et al. <sup>11</sup> (accuracy-young)         |
| Tau SUVR>1.33                   | Tau       | Binary                 | Cutoff from Jack et al. <sup>11</sup> (accuracy-matched)       |
| MT tau (Quartiles)              | Tau       | Non-binary categorical | Quartiles of MT tau SUVR                                       |
| MT tau (BIZ)                    | Tau       | Non-binary categorical | Binarization with an intermediate zone for MT tau SUVR         |

|                         |             |                        |                                                         |
|-------------------------|-------------|------------------------|---------------------------------------------------------|
| Braak staging (3)       | Tau         | Non-binary categorical | Braak staging based on 3 stage model (I, III/IV, V/VI)  |
| Braak staging (6)       | Tau         | Non-binary categorical | Braak staging based on 6 stage model (I, III, V, V, VI) |
| Hippocampus             | Neurodegen. | Continuous             | Hippocampal volume                                      |
| MT volume               | Neurodegen. | Continuous             | Volume of the MT composite region                       |
| Hippocampus (z<-2.0)    | Neurodegen. | Binary                 | Z-score cutoff of 2.0 for hippocampal volume            |
| Hippocampus (z<-2.5)    | Neurodegen. | Binary                 | Z-score cutoff of 2.5 for hippocampal volume            |
| MT volume (z<-2.0)      | Neurodegen. | Binary                 | Z-score cutoff of 2.0 for MT volume                     |
| MT volume (z<-2.5)      | Neurodegen. | Binary                 | Z-score cutoff of 2.5 for MT volume                     |
| Hippocampus (Quartiles) | Neurodegen. | Non-binary categorical | Quartiles of hippocampal volume                         |
| MT volume (Quartiles)   | Neurodegen. | Non-binary categorical | Quartiles of MT volume                                  |

**eTable 1.** Listing of all image-based AT(N) biomarkers used in cognitive prediction models.

91  
92  
93  
94  
95  
96  
97  
98  
99  
100  
101  
102  
103  
104  
105  
106  
107

| Name                  | Citation                                                                                                                                                                                                                                                                                     | Regions                                                                                                                                                                                                                                                                                                                                                                                               |
|-----------------------|----------------------------------------------------------------------------------------------------------------------------------------------------------------------------------------------------------------------------------------------------------------------------------------------|-------------------------------------------------------------------------------------------------------------------------------------------------------------------------------------------------------------------------------------------------------------------------------------------------------------------------------------------------------------------------------------------------------|
| A $\beta$ composite   | <sup>12,13</sup>                                                                                                                                                                                                                                                                             | caudal middle frontal, lateral orbitofrontal, medial orbitofrontal, pars opercularis, pars orbitalis, pars triangularis, rostral middle frontal, superior frontal, frontal pole, caudal anterior cingulate, isthmus cingulate, posterior cingulate, rostral anterior cingulate, inferior parietal, precuneus, superior parietal, supramarginal, inferior temporal, middle temporal, superior temporal |
| MT                    | <sup>11</sup>                                                                                                                                                                                                                                                                                | entorhinal, amygdala, fusiform, inferior temporal, middle temporal                                                                                                                                                                                                                                                                                                                                    |
| Braak I               | <sup>14,15</sup>                                                                                                                                                                                                                                                                             | entorhinal                                                                                                                                                                                                                                                                                                                                                                                            |
| Braak III             |                                                                                                                                                                                                                                                                                              | parahippocampal, fusiform, lingual, amygdala                                                                                                                                                                                                                                                                                                                                                          |
| Braak IV              |                                                                                                                                                                                                                                                                                              | middle temporal, caudal anterior cingulate, rostral anterior cingulate, posterior cingulate, isthmus cingulate, insula, inferior temporal, temporal pole                                                                                                                                                                                                                                              |
| Braak V               |                                                                                                                                                                                                                                                                                              | superior frontal, lateral orbitofrontal, medial orbitofrontal, frontal pole, caudal middle frontal, rostral middle frontal, pars opercularis, pars orbitalis, pars triangularis, lateral occipital, supramarginal, inferior parietal, superior temporal, superior parietal, precuneus, bank of the superior temporal sulcus, transverse temporal                                                      |
| Braak VI              |                                                                                                                                                                                                                                                                                              | pericalcarine, postcentral, cuneus, precentral, paracentral                                                                                                                                                                                                                                                                                                                                           |
| Mattsson Early        |                                                                                                                                                                                                                                                                                              | <sup>1</sup>                                                                                                                                                                                                                                                                                                                                                                                          |
| Mattsson Intermediate | bank SSTS, caudal middle frontal, cuneus, frontal pole, fusiform, inferior parietal, inferior temporal, lateral occipital, middle temporal, parahippocampal, pars opercularis, pars orbitalis, pars triangularis, putamen, rostral anterior cingulate, rostral middle frontal, supramarginal |                                                                                                                                                                                                                                                                                                                                                                                                       |
| Mattsson Late         | lingual, pericalcarine, paracentral, precentral, postcentral                                                                                                                                                                                                                                 |                                                                                                                                                                                                                                                                                                                                                                                                       |
| Collij 1              | <sup>2</sup>                                                                                                                                                                                                                                                                                 | posterior cingulate, isthmus cingulate, anterior cingulate (caudal+rostral)                                                                                                                                                                                                                                                                                                                           |
| Collij 2              |                                                                                                                                                                                                                                                                                              | lateral orbitofrontal, paracentral, precuneus, medial orbitofrontal, inferior frontal (pars opercularis+pars orbitalis+pars triangularis)                                                                                                                                                                                                                                                             |
| Collij 3              |                                                                                                                                                                                                                                                                                              | insula, fusiform, precentral, inferior temporal, parahippocampal, collijinferiorfrontal, superior frontal, lingual, supramarginal, inferior parietal, cuneus, middle frontal (rostral+caudal)                                                                                                                                                                                                         |
| Collij 4              |                                                                                                                                                                                                                                                                                              | lateral occipital, superior parietal, middle temporal, superior temporal, postcentral, entorhinal, frontal pole, temporal pole                                                                                                                                                                                                                                                                        |

108 **eTable 2.** List of Freesurfer regions used for composite regions. Citations are included  
109 for papers which defined these composites. For Collij stging composites, regions  
110 shown joined by plus signs are meta-ROIs constructed prior to averaging for the  
111 composite, as described in the original paper<sup>2</sup>. A $\beta$ =amyloid-beta, MT=meta-temporal,  
112 ROI=region of interest.

113

114

115

116

117

118

119

120

121

122

| Model                                                | A $\beta$              | Tau                    | Neurodegen             |
|------------------------------------------------------|------------------------|------------------------|------------------------|
| Baseline                                             | -                      | -                      | -                      |
| A <sub>BIN</sub>                                     | Binary                 | -                      | -                      |
| T <sub>BIN</sub>                                     | -                      | Binary                 | -                      |
| N <sub>BIN</sub>                                     | -                      | -                      | Binary                 |
| A <sub>CAT</sub>                                     | Non-binary categorical | -                      | -                      |
| T <sub>CAT</sub>                                     | -                      | Non-binary categorical | -                      |
| N <sub>CAT</sub>                                     | -                      | -                      | Non-binary categorical |
| A <sub>CON</sub>                                     | Continuous             | -                      | -                      |
| T <sub>CON</sub>                                     | -                      | Continuous             | -                      |
| N <sub>CON</sub>                                     | -                      | -                      | Continuous             |
| A <sub>BIN</sub> /T <sub>BIN</sub> /N <sub>BIN</sub> | Binary                 | Binary                 | Binary                 |
| A <sub>CAT</sub> /T <sub>CAT</sub> /N <sub>CAT</sub> | Non-binary categorical | Non-binary categorical | Non-binary categorical |
| A <sub>CON</sub> /T <sub>CON</sub> /N <sub>CON</sub> | Continuous             | Continuous             | Continuous             |
| A <sub>CAT</sub> /T <sub>BIN</sub> /N <sub>BIN</sub> | Non-binary categorical | Binary                 | Binary                 |
| A <sub>BIN</sub> /T <sub>CAT</sub> /N <sub>BIN</sub> | Binary                 | Non-binary categorical | Binary                 |
| A <sub>BIN</sub> /T <sub>BIN</sub> /N <sub>CAT</sub> | Binary                 | Binary                 | Non-binary categorical |
| A <sub>CON</sub> /T <sub>BIN</sub> /N <sub>BIN</sub> | Continuous             | Binary                 | Binary                 |
| A <sub>BIN</sub> /T <sub>CON</sub> /N <sub>BIN</sub> | Binary                 | Continuous             | Binary                 |
| A <sub>BIN</sub> /T <sub>BIN</sub> /N <sub>CON</sub> | Binary                 | Binary                 | Continuous             |

123 **eTable 3.** List of linear models predicting PHC<sub>Global</sub> from AT(N) biomarkers. Models  
124 were trained with a nested-cross validation scheme where the inner loop was used to  
125 select the best performing biomarkers, after grouping by pathology (A $\beta$ , tau,  
126 neurodegeneration) and variable type. BIN, CAT, and CON are used to represent  
127 binary, non-binary categorical, and continuous variables (respectively). Dashes are  
128 shown to indicate omission of the corresponding biomarker in the model. All models  
129 also had age, sex, and *APOE* E4 status included as covariates.

130

131

132

133

134

135

136

137

138

139

140



|                             | <b>CDR=0.0</b> | <b>CDR=0.5</b> | <b>CDR=1.0+</b> | <b>p-value</b>   |
|-----------------------------|----------------|----------------|-----------------|------------------|
| <b>n</b>                    | 223            | 130            | 30              |                  |
| <b>Age</b>                  | 73.76 (7.07)   | 75.73 (8.32)   | 77.78 (8.48)    | <b>0.005</b>     |
| <b>Sex (M/F)</b>            | 96/127         | 75/55          | 16/14           | <b>0.026</b>     |
| <b>APOE E4+</b>             | 79 (35.4%)     | 45 (34.6%)     | 13 (43.3%)      | 0.659            |
| <b>Centiloid</b>            | 19.92 (35.65)  | 41.74 (54.70)  | 69.79 (48.77)   | <b>&lt;0.001</b> |
| <b>PHC<sub>Global</sub></b> | 0.84 (0.36)    | 0.35 (0.46)    | -0.47 (0.55)    | <b>&lt;0.001</b> |

**eTable 4:** Characteristics for the subsample with longitudinal cognitive followup.

141  
142  
143  
144  
145  
146  
147  
148  
149  
150  
151  
152  
153  
154  
155  
156  
157  
158  
159  
160  
161  
162  
163  
164  
165

|                             | <b>CDR=0.0</b> | <b>CDR=0.5</b> | <b>CDR=1.0+</b> | <b>p-value</b>   |
|-----------------------------|----------------|----------------|-----------------|------------------|
| <b>n</b>                    | 143            | 83             | 20              |                  |
| <b>Age</b>                  | 73.29 (7.50)   | 74.26 (8.31)   | 75.91 (9.34)    | 0.322            |
| <b>Sex (M/F)</b>            | 59/94          | 54/29          | 10/10           | <b>0.003</b>     |
| <b>APOE E4+</b>             | 49 (34.3%)     | 29 (34.9%)     | 12 (60.0%)      | 0.076            |
| <b>Centiloid</b>            | 19.94 (38.52)  | 45.26 (55.40)  | 74.68 (48.25)   | <b>&lt;0.001</b> |
| <b>PHC<sub>Global</sub></b> | 0.87 (0.35)    | 0.32 (0.50)    | -0.27 (0.53)    | <b>&lt;0.001</b> |

166 **eTable 5:** Characteristics for the subsample with imaging and CSF biomarker  
167 assessments.

168

169

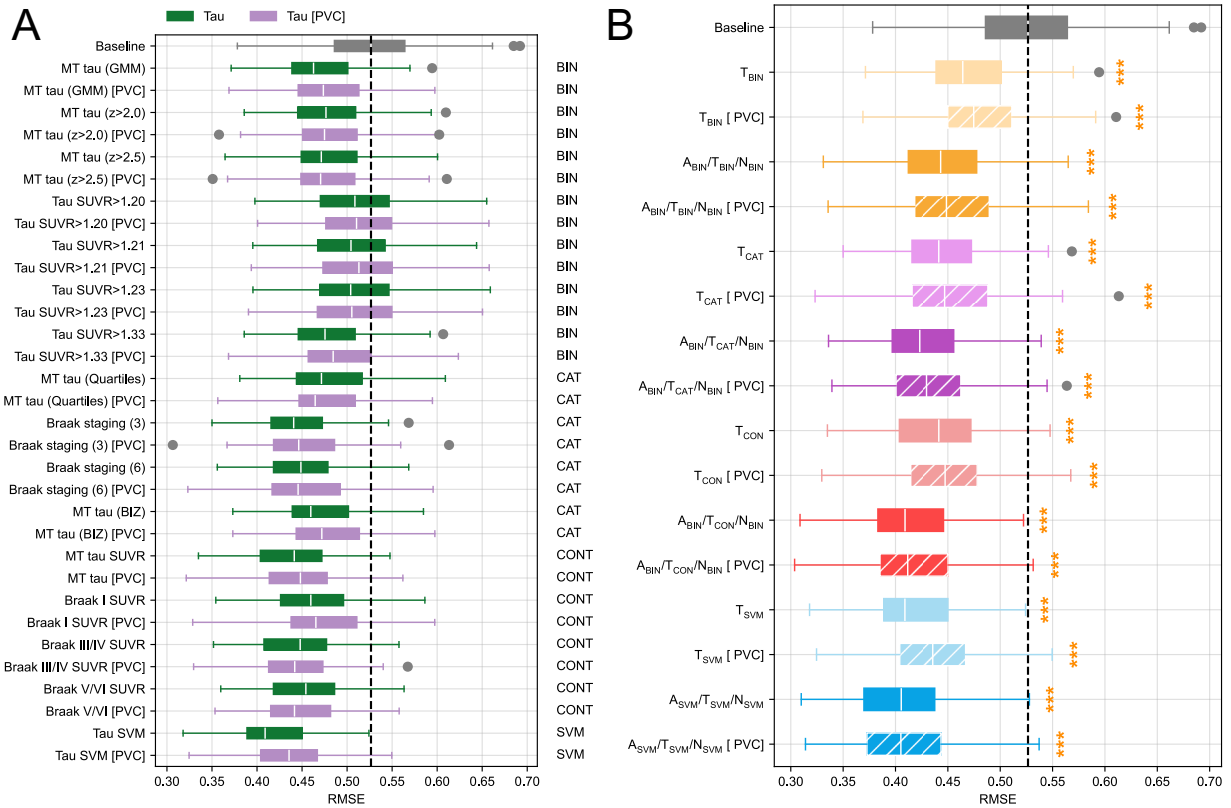

171

172 **eFigure 1:** Comparison of partial volume corrected (PVC) and non-PVC tau predictors  
 173 for modeling cognition. **A.** Boxplots of cross-validated accuracy (RMSE) for models  
 174 including a single tau predictor and covariates. **B.** Boxplots of cross-validated accuracy  
 175 (RMSE) for models with the best selected tau predictors. Solid colors indicate models  
 176 without tau PVC, while hatches indicate models with tau PVC. In both panels, the  
 177 baseline model (just covariates) is shown in gray, with the dotted line indicating its mean  
 178 performance. Gold stars indicate a significant improvement in accuracy relative to the  
 179 baseline model (\*p<0.05, \*\*p<0.01, \*\*\*p<0.001). No significant differences were found  
 180 for comparisons of PVC and non-PVC models (all p>0.05).

181

182

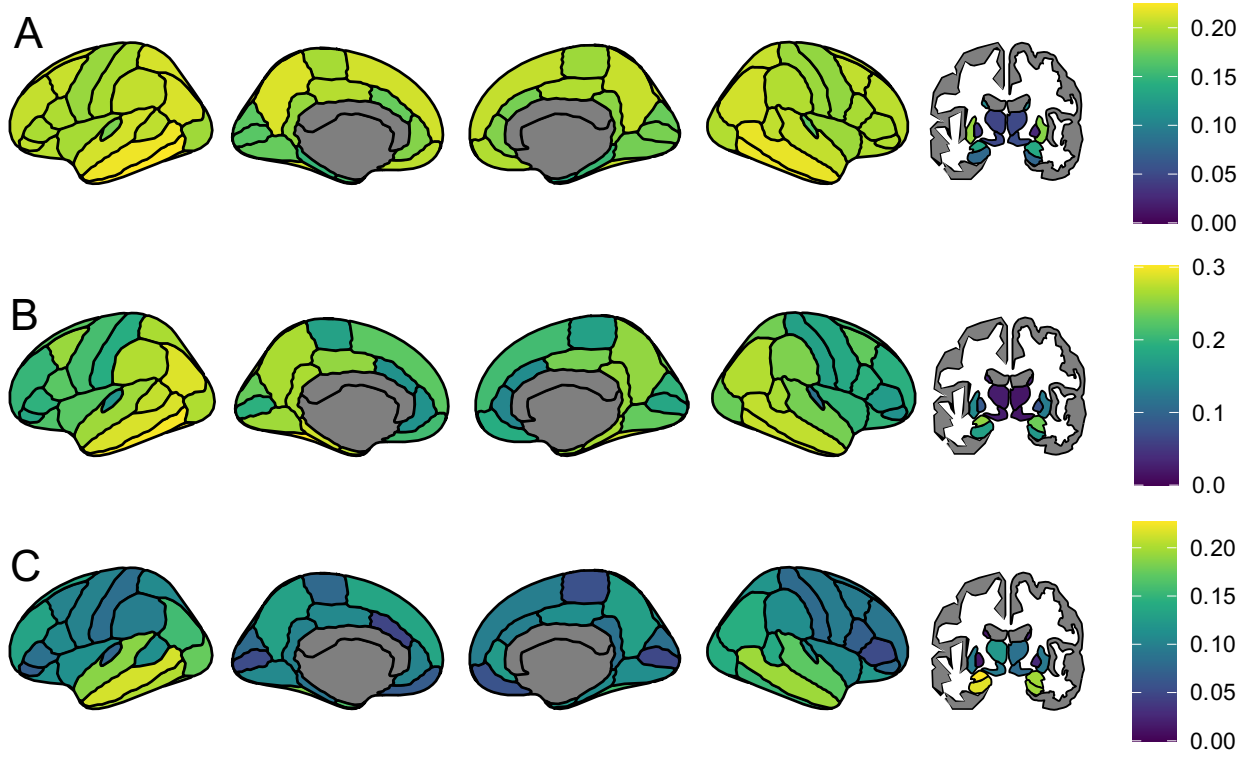

183

184 **eFigure 2:** Regional weights for SVM models which included only A $\beta$  (A, A<sub>SVM</sub>), tau (B,  
 185 T<sub>SVM</sub>), or gray matter volume (C, N<sub>SVM</sub>).

186

187

188

189

190

191

192

193

194

195

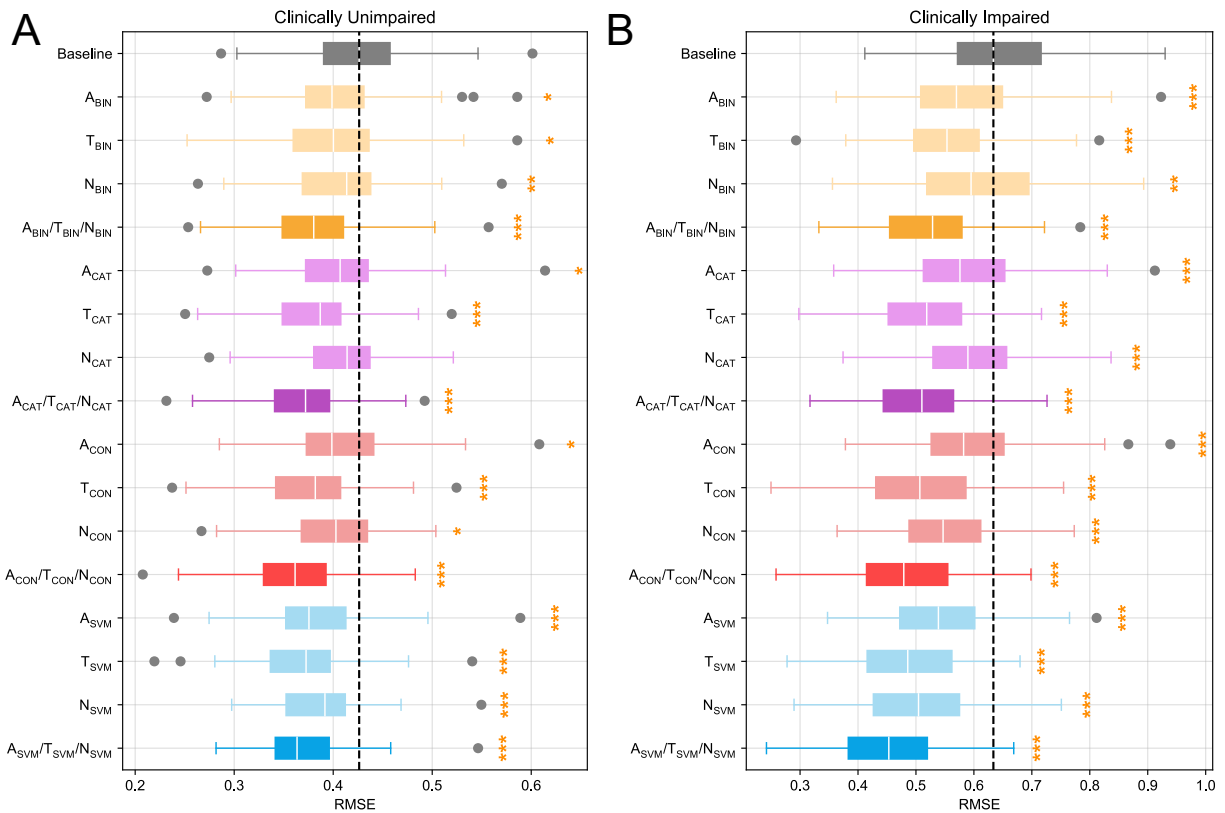

196

197 **eFigure 3:** Boxplots showing cross-validated accuracy (RMSE) measures for predicting  
 198 PHC<sub>Global</sub> in CU (A) and CI (B) individuals. Individual and combination biomarker  
 199 models are compared against a baseline model using only covariates (mean  
 200 performance indicated by dotted line) to predict PHC<sub>Global</sub>. Colors are used to indicate  
 201 the variable type of included biomarkers (yellow: binary, purple: non-binary categorical,  
 202 red: continuous, blue: SVM). Lighter coloring indicates models which only have a single  
 203 pathology assessment, while darker coloring indicates models which have A $\beta$ , tau, and  
 204 neurodegeneration biomarkers. Gold stars indicate a significant improvement in  
 205 accuracy relative to the baseline model (\*p<0.05, \*\*p<0.01, \*\*\*p<0.001).

206

207

208

209

210

211

212

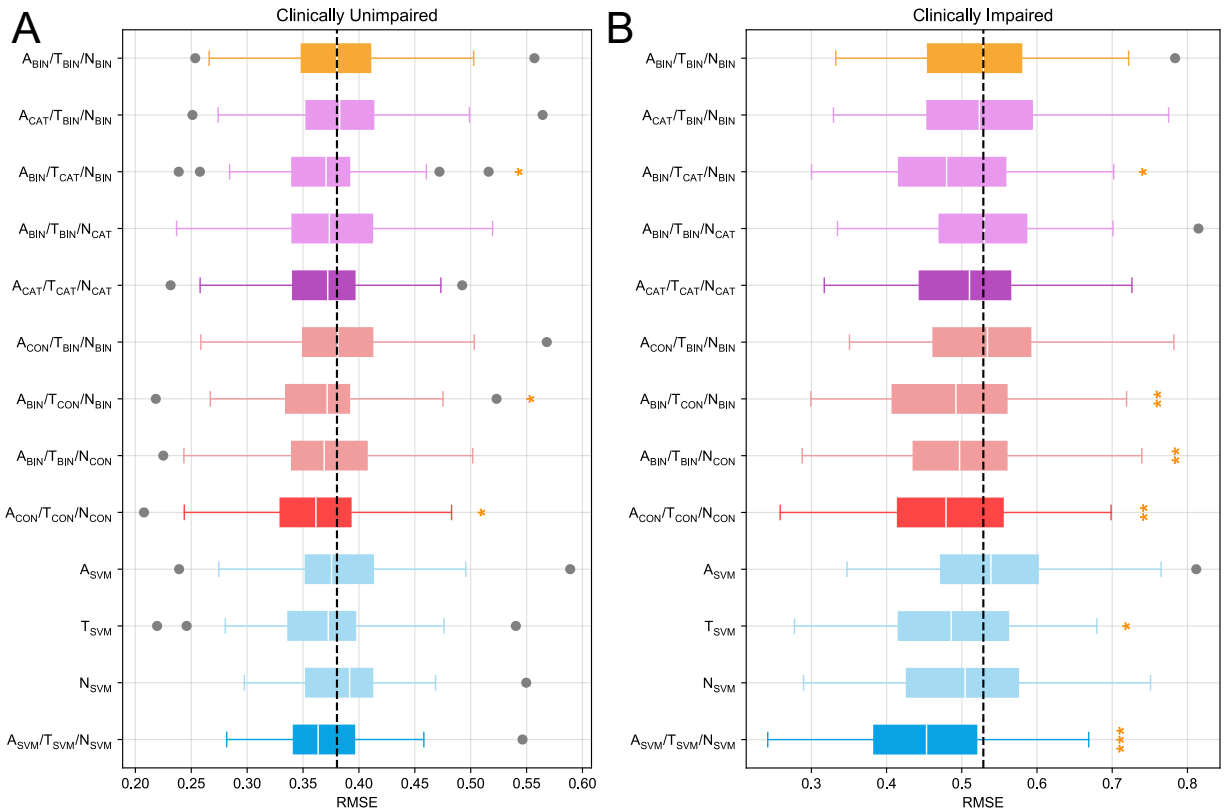

213

214 **eFigure 4:** Boxplots showing cross-validated accuracy (RMSE) measures for predicting  
 215 PHC<sub>Global</sub> in CU (A) and CI (B) individuals. Combination biomarker models with non-  
 216 binary variable types are compared against a baseline model with binary biomarker  
 217 definitions (mean performance indicated by dotted line). Colors are used to indicated  
 218 the variable type of included biomarkers (yellow: binary, purple: non-binary categorical,  
 219 red: continuous, blue: SVM). Lighter coloring indicates models which only have a single  
 220 pathology assessment, while darker coloring indicates models which have A $\beta$ , tau, and  
 221 neurodegeneration biomarkers. Gold stars indicate a significant improvement in  
 222 accuracy relative to the baseline model (\*p<0.05, \*\*p<0.01, \*\*\*p<0.001).

223

224

225

226

227

228

229

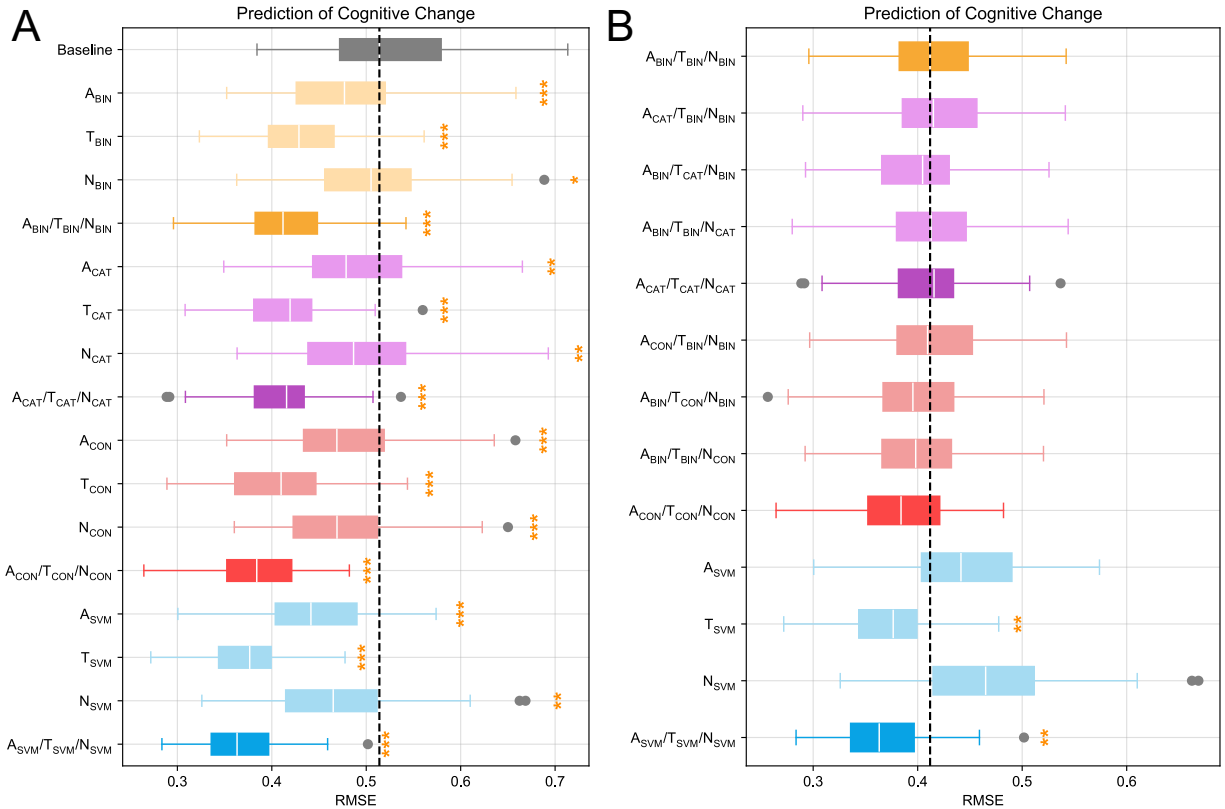

230

231 **eFigure 5:** Results from experiments predicting the longitudinal change in  $PHC_{Global}$ . **A.**  
 232 Individual and combination biomarker models are compared against a baseline model  
 233 using only covariates (mean performance indicated by dotted line). **B.** Combination  
 234 biomarker models with non-binary variable types are compared against a baseline  
 235 model with binary biomarker definitions (mean performance indicated by dotted line). In  
 236 both panels, colors are used to indicate the variable type of included biomarkers  
 237 (yellow: binary, purple: non-binary categorical, red: continuous, blue: SVM). Lighter  
 238 coloring indicates models which only have a single pathology assessment, while darker  
 239 coloring indicates models which have  $A\beta$ , tau, and neurodegeneration biomarkers.  
 240 Gold stars indicate a significant improvement in accuracy relative to the topmost model.  
 241 Gray stars and bars highlight significant pairwise differences between individual models.  
 242 Statistical results are derived from Nadeau-Bengio t-tests with correction for multiple  
 243 comparisons (\* $p < 0.05$ , \*\* $p < 0.01$ , \*\*\* $p < 0.001$ ).

244

245

246

247

248

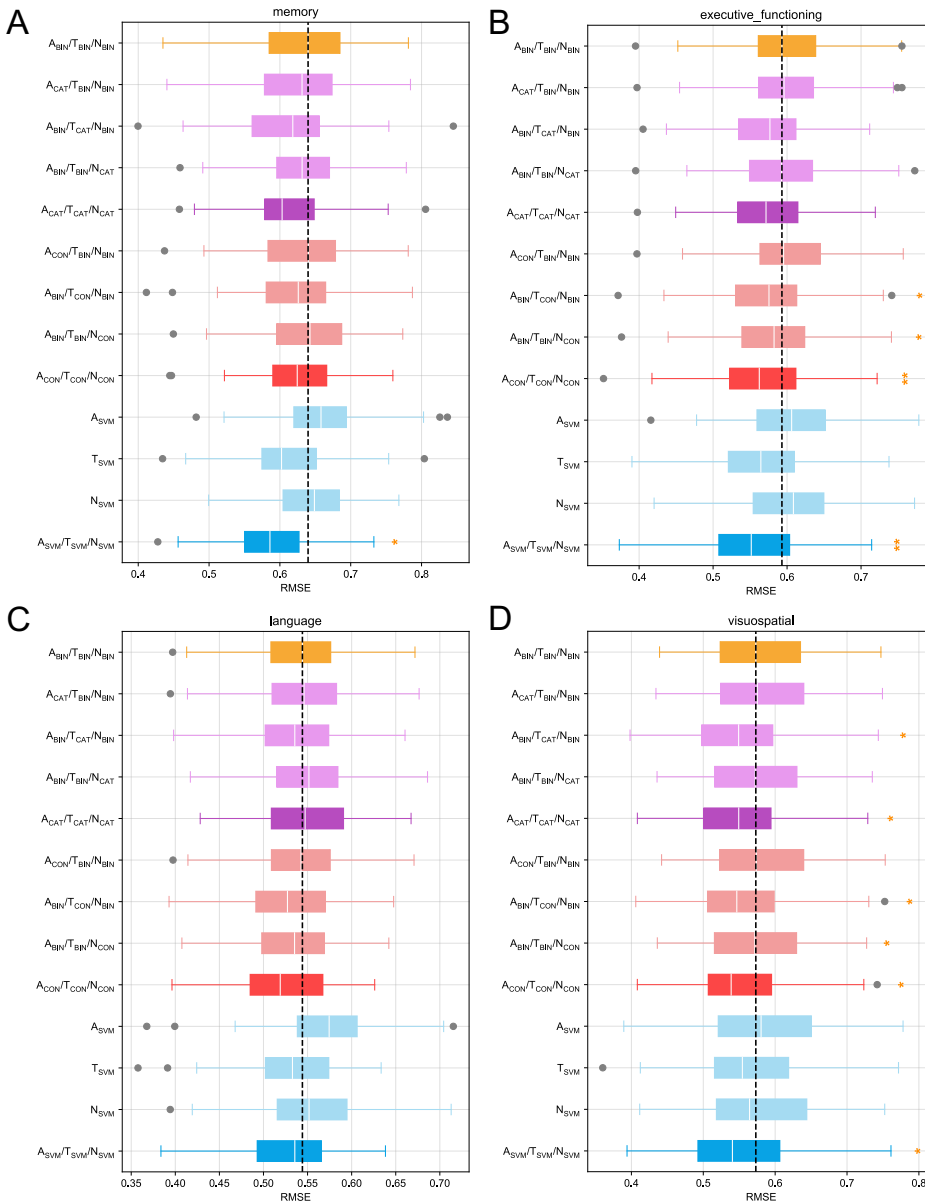

249

250 **eFigure 6:** Boxplots showing cross-validated accuracy estimates (RMSE) for models  
 251 predicting neuropsychological performance from biomarkers. Panels show experiments  
 252 using memory (A), executive functioning (B), language (C), and visuospatial (D)  
 253 composites from the PHC as dependent variables. Combination biomarker models with  
 254 non-binary variable types are compared against a baseline model with binary biomarker  
 255 definitions (mean performance indicated by dotted line). In all panels, colors are used  
 256 to indicate the variable type of included ATN biomarkers (yellow: binary, purple: non-  
 257 binary categorical, red: continuous, blue: SVM). Lighter coloring indicates models which  
 258 only have a single pathology assessment, while darker coloring indicates models which  
 259 have A $\beta$ , tau, and neurodegeneration biomarkers. Gold stars indicate a significant  
 260 improvement in accuracy relative to the topmost model.

261



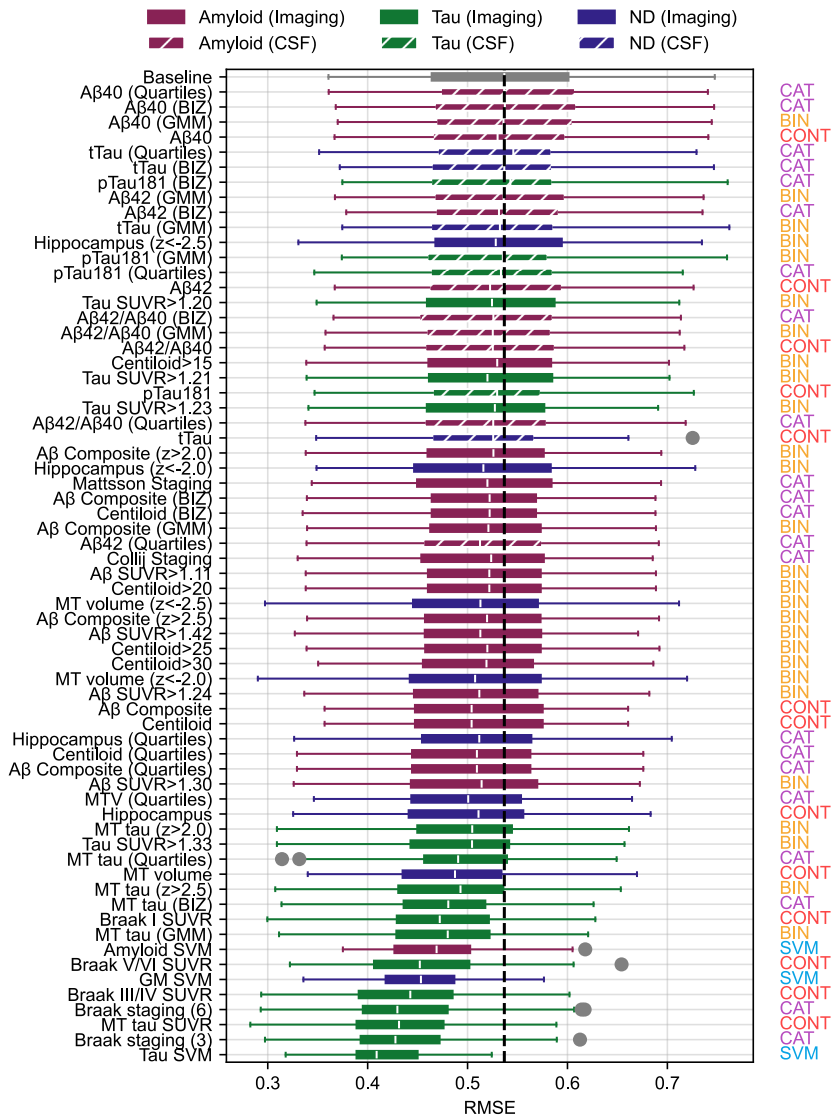

262

263 **eFigure 7:** Alternate version of main text Figure 1 including CSF predictors alongside  
 264 imaging-based ones.

265

266

267

268

269

270

- 272 1. Mattsson N, Palmqvist S, Stomrud E, Vogel J, Hansson O. Staging  $\beta$ -Amyloid  
273 Pathology With Amyloid Positron Emission Tomography. *JAMA Neurology*.  
274 2019;76(11):1319-1329. doi:10.1001/jamaneurol.2019.2214
- 275 2. Collij LE, Heeman F, Salvadó G, et al. Multitracer model for staging cortical amyloid  
276 deposition using PET imaging. *Neurology*. 2020;95(11):e1538-e1553.  
277 doi:10.1212/WNL.0000000000010256
- 278 3. Braak H, Braak E. Neuropathological stageing of Alzheimer-related changes. *Acta*  
279 *Neuropathol*. 1991;82(4):239-259. doi:10.1007/BF00308809
- 280 4. Braak H, Alafuzoff I, Arzberger T, Kretschmar H, Del Tredici K. Staging of  
281 Alzheimer disease-associated neurofibrillary pathology using paraffin sections and  
282 immunocytochemistry. *Acta Neuropathol*. 2006;112(4):389-404.  
283 doi:10.1007/s00401-006-0127-z
- 284 5. Hsu CW, Chang CC, Lin CJ. A Practical Guide to Support Vector Classification.  
285 Published online 2003. <https://www.csie.ntu.edu.tw/~cjlin/papers/guide/guide.pdf>
- 286 6. Haufe S, Meinecke F, Görgen K, et al. On the interpretation of weight vectors of  
287 linear models in multivariate neuroimaging. *NeuroImage*. 2014;87:96-110.  
288 doi:10.1016/j.neuroimage.2013.10.067
- 289 7. Chen J, Ooi LQR, Tan TWK, et al. Relationship between prediction accuracy and  
290 feature importance reliability: An empirical and theoretical study. *Neuroimage*.  
291 2023;274:120115. doi:10.1016/j.neuroimage.2023.120115
- 292 8. Klunk WE, Koeppe RA, Price JC, et al. The Centiloid Project: standardizing  
293 quantitative amyloid plaque estimation by PET. *Alzheimers Dement*. 2015;11(1):1-  
294 15.e1-4. doi:10.1016/j.jalz.2014.07.003
- 295 9. Landau SM, Mintun MA, Joshi AD, et al. Amyloid deposition, hypometabolism, and  
296 longitudinal cognitive decline. *Annals of Neurology*. 2012;72(4):578-586.  
297 doi:10.1002/ana.23650
- 298 10. Su Y, Flores S, Wang G, et al. Comparison of Pittsburgh compound B and  
299 florbetapir in cross-sectional and longitudinal studies. *Alzheimers Dement (Amst)*.  
300 2019;11:180-190. doi:10.1016/j.dadm.2018.12.008
- 301 11. Jack CR, Wiste HJ, Weigand SD, et al. Defining imaging biomarker cut-points for  
302 brain aging and Alzheimer's disease. *Alzheimers Dement*. 2017;13(3):205-216.  
303 doi:10.1016/j.jalz.2016.08.005

- 304 12. Mormino EC, Kluth JT, Madison CM, et al. Episodic memory loss is related to  
305 hippocampal-mediated beta-amyloid deposition in elderly subjects. *Brain*.  
306 2009;132(Pt 5):1310-1323. doi:10.1093/brain/awn320
- 307 13. Jagust WJ, Landau SM, Shaw LM, et al. Relationships between biomarkers in aging  
308 and dementia. *Neurology*. 2009;73(15):1193-1199.  
309 doi:10.1212/WNL.0b013e3181bc010c
- 310 14. Therriault J, Pascoal TA, Lussier FZ, et al. Biomarker modeling of Alzheimer's  
311 disease using PET-based Braak staging. *Nat Aging*. 2022;2(6):526-535.  
312 doi:10.1038/s43587-022-00204-0
- 313 15. Pascoal TA, Therriault J, Benedet AL, et al. 18F-MK-6240 PET for early and late  
314 detection of neurofibrillary tangles. *Brain*. 2020;143(9):2818-2830.  
315 doi:10.1093/brain/awaa180
- 316
